# Supplementary material for: Mapping the citation network on vitamin D research in Australia: a data-driven approach
Source: PubMed Central journal article supplement (PMC10713817; doi:10.3389/fmed.2023.1298190), 2023-11-28
Supplement: Presentation_1.pdf [file Presentation_1.pdf]

**Supplementary Table S1.** Topic 1:140 publications, Vitamin D in vulnerable populations and its impact on child development

|                                                                 |                                                                                                                                                                                                                                                   | Citation network | Word cloud                                        |
|-----------------------------------------------------------------|---------------------------------------------------------------------------------------------------------------------------------------------------------------------------------------------------------------------------------------------------|------------------|---------------------------------------------------|
|                                                                 |                                                                                                                                                                                                                                                   |                  |                                                   |
| Sub-topics and number of publications                           | Indicative publication                                                                                                                                                                                                                            | Word cloud       | Top 5 most unique topic terms                     |
| 1a: (n=44)<br>Vitamin D deficiency in Australians and migrants  | Nowson CA, Margerison C. Vitamin D intake and vitamin D status of Australians. Med J Aust. 2002;177(3):149-152. doi: 10.5694/j.1326-5377.2002.tb04702.x. (1)                                                                                      |                  | defici*<br>risk<br>high<br>migrant*<br>popul*     |
| 1aa: (n=27)<br>Vitamin D deficiency in women and child migrants | Grover SR, Morley R. Vitamin D deficiency in veiled or dark-skinned pregnant women. Med J Aust. 2001;175(5):251-252. doi: 10.5694/j.1326-5377.2001.tb143558.x. (2)                                                                                |                  | defici*<br>risk<br>health<br>children<br>migrant* |
| 1aaa: (n=16)<br>Vitamin D deficiency in adult migrant women     | Skull SA, Ngeow JY, Biggs BA, Street A, Ebeling PR. Vitamin D deficiency is common and unrecognized among recently arrived adult immigrants from The Horn of Africa. Intern Med J. 2003;33(1-2):47-51. doi: 10.1046/j.1445-5994.2003.00344.x. (3) |                  | health<br>risk<br>migrant*<br>among<br>Australia  |





|                                                                                     |                                                                                                                                                                                                                                                                                         |  |                                                                     |
|-------------------------------------------------------------------------------------|-----------------------------------------------------------------------------------------------------------------------------------------------------------------------------------------------------------------------------------------------------------------------------------------|--|---------------------------------------------------------------------|
| <p>1bbb: (n=7)<br/>Treatment for children with vitamin D deficiency</p>             | <p>Rigterink T, Appleton L, Day AS. Vitamin D therapy in children with inflammatory bowel disease: A systematic review. <i>World J Clin Pediatr.</i> 2019;8(1):1-14. doi: 10.5409/wjcp.v8.i1.1. (13)</p>                                                                                |  | <p>children<br/>defici*<br/>therapi*<br/>insuffici*<br/>daili*</p>  |
| <p>1bc: (n=7)<br/>Maternal vitamin D and child development</p>                      | <p>Whitehouse AJ, Holt BJ, Serralha M, Holt PG, Kusel MM, Hart PH. Maternal serum vitamin D levels during pregnancy and offspring neurocognitive development. <i>Pediatrics.</i> 2012;129(3):485-493. doi: 10.1542/peds.2011-2644. (14)</p>                                             |  | <p>matern*<br/>offspr*<br/>age<br/>mother<br/>infant</p>            |
| <p>1c: (n=26)<br/>Vitamin D deficiency and bone health in children</p>              | <p>Pasco JA, Henry MJ, Nicholson GC, Sanders KM, Kotowicz MA. Vitamin D status of women in the Geelong Osteoporosis Study: association with diet and casual exposure to sunlight. <i>Med J Aust.</i> 2001;175(8):401-405. doi: 10.5694/j.1326-5377.2001.tb143643.x. (15)</p>            |  | <p>bone<br/>supplemen<br/>t<br/>intak*<br/>effect<br/>offspr*</p>   |
| <p>1ca: (n=12)<br/>Vitamin D supplement intake and bone health in children</p>      | <p>Jones G, Dwyer T, Hynes KL, Parameswaran V, Greenaway TM. Vitamin D insufficiency in adolescent males in Southern Tasmania: prevalence, determinants, and relationship to bone turnover markers. <i>Osteoporos Int.</i> 2005;16(6):636-641. doi: 10.1007/s00198-004-1733-z. (16)</p> |  | <p>bone<br/>children<br/>supplemen<br/>t<br/>defici*<br/>effect</p> |
| <p>1cb: (n=8)<br/>Vitamin D intake during gestation and bone health of children</p> | <p>Pasco JA, Wark JD, Carlin JB, Ponsonby AL, Vuillermin PJ, Morley R. Maternal vitamin D in pregnancy may influence not only offspring bone mass but other aspects of musculoskeletal health and adiposity. <i>Med Hypotheses.</i> 2008;71(2):266-269. doi:</p>                        |  | <p>matern*<br/>offspr*<br/>pregnanc*<br/>intak*<br/>gestation</p>   |

10.1016/j.mehy.2008.01.033.  
(17)

1d: (n=17)  
Vitamin D  
deficiency in  
child refugees

Tiong AC, Patel MS, Gardiner  
J, Ryan R, Linton KS, Walker  
KA, Scopel J, Biggs BA.  
Health issues in newly arrived  
African refugees attending  
general practice clinics in  
Melbourne. Med J Aust.  
2006;185(11-12):602-606. doi:  
10.5694/j.1326-  
5377.2006.tb00724.x. (18)

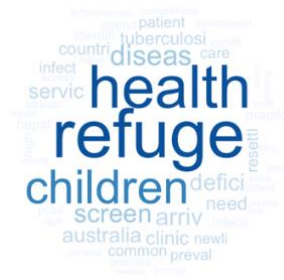

refuge\*  
health  
children  
diseas\*  
screen\*

---

Note: The citation network provides an overview of the top 40 citation links within the topic. The nodes indicate the first author of the publication, and the lines linking the nodes represents the citation links. The publication year is plotted on the left. The word cloud shows the frequency words within the topic and sub-topics, where words with a higher frequency have a larger size and opacity.

**Supplementary Table S2.** Topic 2: 116 publications, Impact of sun exposure and UVB radiation on various health conditions

| Citation network                                                                  |                                                                                                                                                                                                                                                                                                                       | Word cloud |                                                   |
|-----------------------------------------------------------------------------------|-----------------------------------------------------------------------------------------------------------------------------------------------------------------------------------------------------------------------------------------------------------------------------------------------------------------------|------------|---------------------------------------------------|
|                                                                                   |                                                                                                                                                                                                                                                                                                                       |            |                                                   |
| Sub-topics and number of publications                                             | Indicative publication                                                                                                                                                                                                                                                                                                | Word cloud | Top 5 most unique topic terms                     |
| 2a: (n=34)<br>Vitamin D and multiple sclerosis                                    | van der Mei IA, Ponsonby AL, Dwyer T, Blizzard L, Taylor BV, Kilpatrick T, Butzkueven H, McMichael AJ. Vitamin D levels in people with multiple sclerosis and community controls in Tasmania, Australia. <i>J Neurol.</i> 2007;254(5):581-590. doi: 10.1007/s00415-006-0315-8. (19)                                   |            | multipl*<br>sclerosi*<br>risk<br>relaps*<br>birth |
| 2b: (n=34)<br>Impact of the environment on vitamin D status and CNS demyelination | Lucas RM, Ponsonby AL, Dear K, Valery PC, Pender MP, Taylor BV, Kilpatrick TJ, Dwyer T, Coulthard A, Chapman C, van der Mei I, Williams D, McMichael AJ. Sun exposure and vitamin D are independent risk factors for CNS demyelination. <i>Neurology.</i> 2011;76(6):540-548. doi: 10.1212/WNL.0b013e31820af93d. (20) |            | time<br>day<br>Australian<br>physic*<br>fractur*  |

|                                                                    |                                                                                                                                                                                                                                                                                                                                                                                                                  |  |                                                                  |
|--------------------------------------------------------------------|------------------------------------------------------------------------------------------------------------------------------------------------------------------------------------------------------------------------------------------------------------------------------------------------------------------------------------------------------------------------------------------------------------------|--|------------------------------------------------------------------|
| 2ba: (n=16)<br>Latitude<br>gradient and<br>vitamin D<br>status     | Lucas RM, Ponsonby AL, Dear K, Valery PC, Taylor B, van der Mei I, McMichael AJ, Pender MP, Chapman C, Coulthard A, Kilpatrick TJ, Stankovich J, Williams D, Dwyer T. Vitamin D status: multifactorial contribution of environment, genes and other factors in healthy Australian adults across a latitude gradient. <i>J Steroid Biochem Mol Biol.</i> 2013;136:300-308. doi: 10.1016/j.jsbmb.2013.01.011. (21) |  | exposur*<br>uvr<br>sun<br>physic*<br>use                         |
| 2bb: (n=12)<br>Vitamin D<br>status and<br>CNS<br>demyelinati<br>on | Lucas R, Ponsonby AL, McMichael A, van der Mei I, Chapman C, Coulthard A, Dear K, Dwyer T, Kilpatrick T, Pender M, Taylor B, Valery P, Williams D. Observational analytic studies in multiple sclerosis: controlling bias through study design and conduct. <i>The Australian Multicentre Study of Environment and Immune Function. Mult Scler.</i> 2007;13(7):827-839. doi: 10.1177/1352458507077174. (22)      |  | risk<br>case<br>fcd (CNS<br>demyelination)<br>demyelin*<br>first |
| 2c: (n=19)<br>Vitamin D and<br>food allergies                      | Staples JA, Ponsonby AL, Lim LL, McMichael AJ. Ecologic analysis of some immune-related disorders, including type 1 diabetes, in Australia: latitude, regional ultraviolet radiation, and disease prevalence. <i>Environ Health Perspect.</i> 2003;111(4):518-523. doi: 10.1289/ehp.5941. (23)                                                                                                                   |  | food<br>allergi*<br>rate<br>age<br>region                        |



|                                                         |                                                                                                                                                                                                                                                                              |  |                                                                                  |
|---------------------------------------------------------|------------------------------------------------------------------------------------------------------------------------------------------------------------------------------------------------------------------------------------------------------------------------------|--|----------------------------------------------------------------------------------|
| 2d: (n=13)<br>Vitamin D status<br>and melanoma          | Jablonski NG, Chaplin G. The evolution of human skin coloration. <i>J Hum Evol.</i> 2000;39(1):57-106. doi: 10.1006/jhev.2000.0403. (24)                                                                                                                                     |  | skin<br>melanoma<br>folat*<br>may<br>cmm<br>(cutaneous<br>malignant<br>melanoma) |
| 2e: (n=9)<br>Vitamin D status<br>and myopia risk        | van der Mei IA, Blizzard L, Ponsonby AL, Dwyer T. Validity and reliability of adult recall of past sun exposure in a case-control study of multiple sclerosis. <i>Cancer Epidemiol Biomarkers Prev.</i> 2006;15(8):1538-1544. doi: 10.1158/1055-9965.EPI-05-0969. (25)       |  | sun<br>exposur*<br>myopia<br>concentr*<br>measur*                                |
| 2f: (n=7)<br>Vitamin D status<br>and type 1<br>diabetes | Elliott JC, Lucas RM, Clements MS, Bambrick HJ. Population density determines the direction of the association between ambient ultraviolet radiation and type 1 diabetes incidence. <i>Pediatr Diabetes.</i> 2010;11(6):394-402. doi: 10.1111/j.1399-5448.2009.00620.x. (26) |  | uvr<br>preval*<br>case<br>incid*<br>diabet*                                      |

Note: The citation network provides an overview of the top 40 citation links within the topic. Each node is labelled with the surname of the first author of the citation, and the lines linking the nodes represents the citation links. The publication year is plotted on the left. The word cloud shows the frequency words within the topic and sub-topics, where words with a higher frequency have a larger size and opacity.







---

10.1093/gerona/glt059.  
(34)

3f: (n=13) Association between low vitamin D status and falls and fracture risk in older adults

Latham NK, Anderson CS, Lee A, Bennett DA, Moseley A, Cameron ID; Fitness Collaborative Group. A randomized, controlled trial of quadriceps resistance exercise and vitamin D in frail older people: the Frailty Interventions Trial in Elderly Subjects (FITNESS). *J Am Geriatr Soc.* 2003;51(3):291-299. doi: 10.1046/j.1532-5415.2003.51101.x (35)

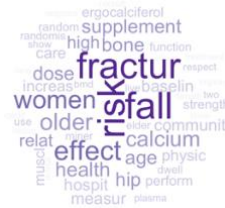

risk  
fractur\*  
effect  
dose  
relat\*

3g: (n=10) Vitamin D status and bone mineral density

Morris HA, Morrison GW, Burr M, Thomas DW, Nordin BE. Vitamin D and femoral neck fractures in elderly South Australian women. *Med J Aust.* 1984;140(9):519-521. doi: 10.5694/j.1326-5377.1984.tb108222.x. (36)

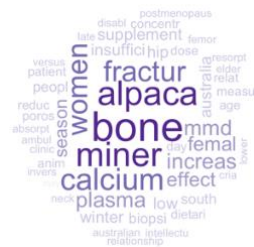

bone  
miner\*  
alpaca  
calcium  
increas\*

---

Note: The citation network provides an overview of the top 40 citation links within the topic. Each node is labelled with the surname of the first author of the citation, and the lines linking the nodes represents the citation links. The publication year is plotted on the left. The word cloud shows the frequency words within the topic and sub-topics, where words with a higher frequency have a larger size and opacity.

**Supplementary Table S4.** Topic 4: 110 publications, Vitamin D and its association with health outcomes

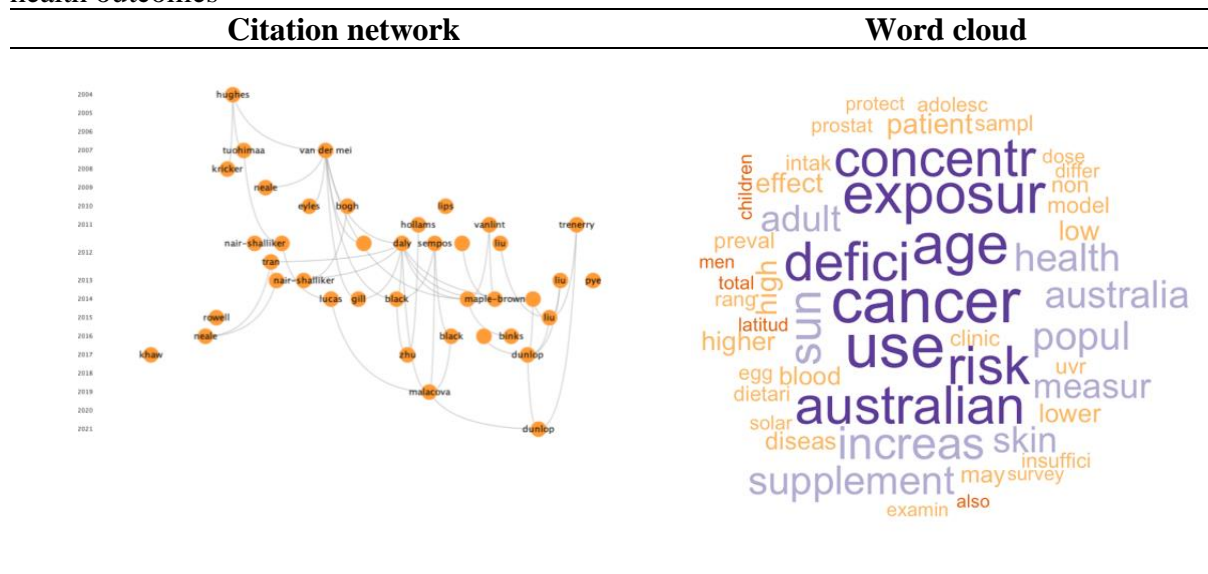

| Sub-topics and number of publications                               | Indicative publication                                                                                                                                                                                                                                                                                                                                                 | Word cloud | Top 5 most unique topic terms                                      |
|---------------------------------------------------------------------|------------------------------------------------------------------------------------------------------------------------------------------------------------------------------------------------------------------------------------------------------------------------------------------------------------------------------------------------------------------------|------------|--------------------------------------------------------------------|
| <p>4a: (n=29)<br/>Vitamin D supplementation and health outcomes</p> | <p>Daly RM, Gagnon C, Lu ZX, Magliano DJ, Dunstan DW, Sikaris KA, Zimmet PZ, Ebeling PR, Shaw JE. Prevalence of vitamin D deficiency and its determinants in Australian adults aged 25 years and older: a national, population-based study. <i>Clin Endocrinol (Oxf)</i>. 2012;77(1):26-35. doi: 10.1111/j.1365-2265.2011.04320.x. (37)</p>                            |            | <p>age<br/>concentr*<br/>adult<br/>supplement<br/>t<br/>higher</p> |
| <p>4aa: (n=13)<br/>Vitamin D deficiency and metabolic syndrome</p>  | <p>Gagnon C, Lu ZX, Magliano DJ, Dunstan DW, Shaw JE, Zimmet PZ, Sikaris K, Ebeling PR, Daly RM. Low serum 25-hydroxyvitamin D is associated with increased risk of the development of the metabolic syndrome at five years: results from a national, population-based prospective study (The Australian Diabetes, Obesity and Lifestyle Study: AusDiab). <i>J</i></p> |            | <p>defici*<br/>patient<br/>popul*<br/>met<br/>aor*</p>             |







Note: The citation network provides an overview of the top 40 citation links within the topic. Each node is labelled with the surname of the first author of the citation, and the lines linking the nodes represents the citation links. The publication year is plotted on the left. The word cloud shows the frequency words within the topic and sub-topics, where words with a higher frequency have a larger size and opacity.







|                                                                                                 |                                                                                                                                                                                                                                                                                                             |                                                                                      |                                                        |
|-------------------------------------------------------------------------------------------------|-------------------------------------------------------------------------------------------------------------------------------------------------------------------------------------------------------------------------------------------------------------------------------------------------------------|--------------------------------------------------------------------------------------|--------------------------------------------------------|
| young women                                                                                     | Health Res. 2015;4(3):594. doi: 10.4081/jphr.2015.594. (54)                                                                                                                                                                                                                                                 |                                                                                      |                                                        |
| 6b: (n=15)<br>Prevention and treatment of osteoporosis in patients with minimal trauma fracture | Sambrook PN, Seeman E, Phillips SR, Ebeling PR; Osteoporosis Australia; National Prescribing Service. Preventing osteoporosis: outcomes of the Australian Fracture Prevention Summit. Med J Aust. 2002;176(S8):S1-16. doi: 10.5694/j.1326-5377.2002.tb04475.x. (55)                                         |    | osteoporosi*<br>patient<br>prevent<br>trauma<br>minim* |
| 6c: (n=13)<br>Calcium supplement and bone health                                                | Ebeling PR, Daly RM, Kerr DA, Kimlin MG. Building healthy bones throughout life: an evidence-informed strategy to prevent osteoporosis in Australia. Med J Aust. 2013;199(S7):S1-S46. doi: 10.5694/j.1326-5377.2013.tb04225.x. (56)                                                                         |    | calcium<br>risk<br>time<br>supplement<br>increas*      |
| 6d: (n=9)<br>Preventing osteoporotic fractures with vitamin D and calcium supplement            | Nguyen TV, Center JR, Eisman JA. Osteoporosis: underrated, underdiagnosed and undertreated. Med J Aust. 2004;180(S5):S18-22. doi: 10.5694/j.1326-5377.2004.tb05908.x. (57)                                                                                                                                  |  | fractur*<br>use<br>hip<br>osteoporot*<br>servic*       |
| 6e: (n=8)<br>Treatment of osteoporosis                                                          | Bleicher K, Naganathan V, Cumming RG, Seibel MJ, Sambrook PN, Blyth FM, Le Couteur DG, Handelsman DJ, Waite LM, Creasey HM. Prevalence and treatment of osteoporosis in older Australian men: findings from the CHAMP study. Med J Aust. 2010;193(7):387-391. doi: 10.5694/j.1326-5377.2010.tb03964.x. (58) |  | treatment<br>mortal*<br>men<br>manag*<br>exercis*      |

Note: The citation network provides an overview of the top 40 citation links within the topic. Each node is labelled with the surname of the first author of the citation, and the lines linking

the nodes represents the citation links. The publication year is plotted on the left. The word cloud shows the frequency words within the topic and sub-topics, where words with a higher frequency have a larger size and opacity.

**Supplementary Table S7. Topic 7: 40 publications, Testing of vitamin D status in Australia**

**Citation network**

**Word cloud**

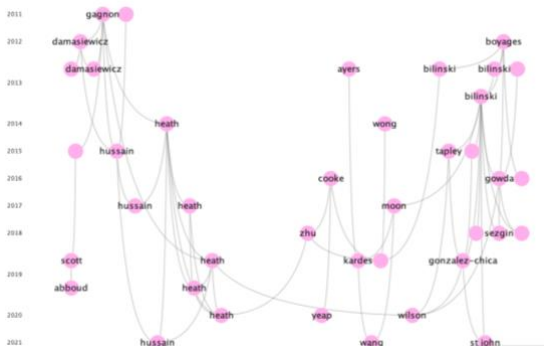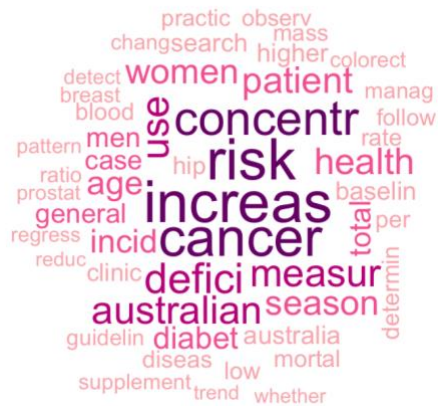

| Sub-topics and number of publications                                | Indicative publication                                                                                                                                                                                                                                                                                                                                                | Word cloud | Most unique topic terms                               |
|----------------------------------------------------------------------|-----------------------------------------------------------------------------------------------------------------------------------------------------------------------------------------------------------------------------------------------------------------------------------------------------------------------------------------------------------------------|------------|-------------------------------------------------------|
| 7a: (n=14) Clinical practice guidelines for vitamin D testing        | Bilinski K, Boyages S<br>Evidence of overtesting for vitamin D in Australia: an analysis of 4.5 years of Medicare Benefits Schedule (MBS) data. <i>BMJ Open</i> . 2013; 3:e002955. doi: 10.1136/bmjopen-2013-002955. (59)                                                                                                                                             |            | increas*<br>patient<br>general<br>defici*<br>practic* |
| 7b: (n=13) Testing Vitamin D status and incidence of type 2 diabetes | Gagnon C, Lu ZX, Magliano DJ, Dunstan DW, Shaw JE, Zimmet PZ, Sikaris K, Grantham N, Ebeling PR, Daly RM. Serum 25-hydroxyvitamin D, calcium intake, and risk of type 2 diabetes after 5 years: results from a national, population-based prospective study (the Australian Diabetes, Obesity and Lifestyle study). <i>Diabetes Care</i> . 2011;34(5):1133-1138. doi: |            | concentr*<br>risk<br>diabet*<br>cancer<br>incid*      |

Note: The citation network provides an overview of the top 40 citation links within the topic. Each node is labelled with the surname of the first author of the citation, and the lines linking the nodes represents the citation links. The publication year is plotted on the left. The word cloud shows the frequency words within the topic and sub-topics, where words with a higher frequency have a larger size and opacity.



**Supplementary Table S8. Topic 8: 14 publications, Vitamin D status and knee osteoarthritis**

**Citation Network**

**Word cloud**

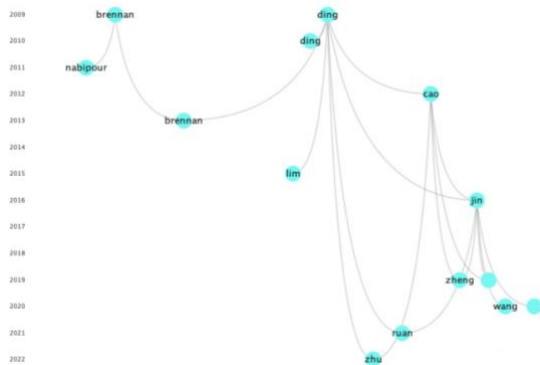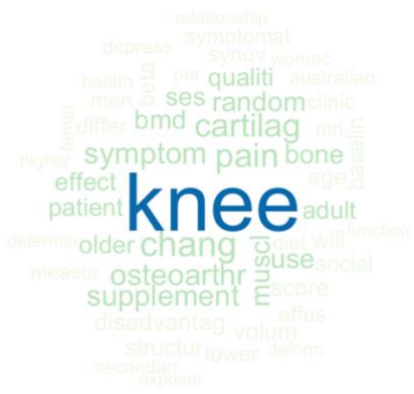

| Indicative publication                                                                                                                                                                                                                                                      | Most unique topic terms                            |
|-----------------------------------------------------------------------------------------------------------------------------------------------------------------------------------------------------------------------------------------------------------------------------|----------------------------------------------------|
| Ding C, Cicuttini F, Parameswaran V, Burgess J, Quinn S, Jones G. Serum levels of vitamin D, sunlight exposure, and knee cartilage loss in older adults: the Tasmanian older adult cohort study. <i>Arthritis Rheum.</i> 2009;60(5):1381-1389. doi: 10.1002/art.24486. (61) | knee<br>chang*<br>pain<br>cartilag*<br>osteoarthr* |

Note: The citation network provides an overview of the citation links within the topic. Each node is labelled with the surname of the first author of the citation, and the lines linking the nodes represents the citation links. The publication year is plotted on the left. The word cloud shows the frequency words within the topic and sub-topics, where words with a higher frequency have a larger size and opacity.

**Supplementary Table S9.** Topic 9: 7 publications, Vitamin D status and exercise performance in athletes

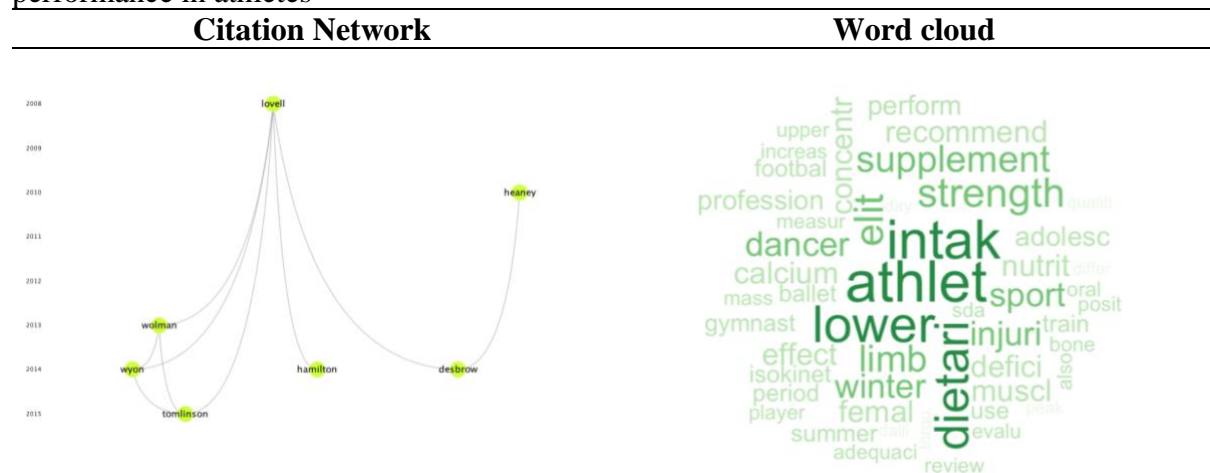

| Indicative publication                                                                                                                              | Most unique topic terms                            |
|-----------------------------------------------------------------------------------------------------------------------------------------------------|----------------------------------------------------|
| Lovell G. Vitamin D status of females in an elite gymnastics program. Clin J Sport Med. 2008;18(2):159-161. doi: 10.1097/JSM.0b013e3181650eee. (62) | athlet*<br>intak*<br>lower<br>dietari*<br>strength |

Note: The citation network provides an overview of the citation links within the topic. Each node is labelled with the surname of the first author of the citation, and the lines linking the nodes represents the citation links. The publication year is plotted on the left. The word cloud shows the frequency words within the topic and sub-topics, where words with a higher frequency have a larger size and opacity.

## References

1. Nowson CA, Margerison C. Vitamin D Intake and Vitamin D Status of Australians. *Med J Aust.* (2002) 177(3):149-52. doi: 10.5694/j.1326-5377.2002.tb04702.x.
2. Grover SR, Morley R. Vitamin D Deficiency in Veiled or Dark-Skinned Pregnant Women. *Med J Aust.* (2001) 175(5):251-2. doi: 10.5694/j.1326-5377.2001.tb143558.x.
3. Skull SA, Ngeow JY, Biggs BA, Street A, Ebeling PR. Vitamin D Deficiency Is Common and Unrecognized among Recently Arrived Adult Immigrants from the Horn of Africa. *Intern Med J.* (2003) 33(1-2):47-51. doi: 10.1046/j.1445-5994.2003.00344.x.
4. Nozza JM, Rodda CP. Vitamin D Deficiency in Mothers of Infants with Rickets. *Med J Aust.* (2001) 175(5):253-5. doi: 10.5694/j.1326-5377.2001.tb143559.x.
5. Joshi D, Center JR, Eisman JA. Vitamin D Deficiency in Adults. *Aust Prescr.* (2010) 33:103-6. doi: 10.18773/austprescr.2010.053.
6. Brock K, Wilkinson M, Cook R, Lee S, Bermingham M. Associations with Vitamin D Deficiency in "at Risk" Australians. *J Steroid Biochem Mol Biol.* (2004) 89-90(1-5):581-8. doi: 10.1016/j.jsbmb.2004.03.073.
7. Paxton GA, Teale GR, Nowson CA, Mason RS, McGrath JJ, Thompson MJ, et al. Vitamin D and Health in Pregnancy, Infants, Children and Adolescents in Australia and New Zealand: A Position Statement. *Med J Aust.* (2013) 198(3):142-3. doi: 10.5694/mja11.11592.
8. Bowyer L, Catling-Paull C, Diamond T, Homer C, Davis G, Craig ME. Vitamin D, Pth and Calcium Levels in Pregnant Women and Their Neonates. *Clin Endocrinol (Oxf).* (2009) 70(3):372-7. doi: 10.1111/j.1365-2265.2008.03316.x.
9. Teale GR, Cunningham CE. Vitamin D Deficiency Is Common among Pregnant Women in Rural Victoria. *Aust N Z J Obstet Gynaecol.* (2010) 50(3):259-61. doi: 10.1111/j.1479-828X.2010.01147.x.

10. Thomas SD, Fudge AN, Whiting M, Coates PS. The Correlation between Third-Trimester Maternal and Newborn-Serum 25-Hydroxy-Vitamin D in a Selected South Australian Group of Newborn Samples. *BMJ Open*. (2011) 1(2):e000236. doi: 10.1136/bmjopen-2011-000236.
11. Munns CF, Simm PJ, Rodda CP, Garnett SP, Zacharin MR, Ward LM, et al. Incidence of Vitamin D Deficiency Rickets among Australian Children: An Australian Paediatric Surveillance Unit Study. *Med J Aust*. (2012) 196(7):466-8. doi: 10.5694/mja11.10662.
12. Matsuyama M, Harb T, David M, Davies PS, Hill RJ. Effect of Fortified Milk on Growth and Nutritional Status in Young Children: A Systematic Review and Meta-Analysis. *Public Health Nutr*. (2017) 20(7):1214-25. doi: 10.1017/s1368980016003189.
13. Rigterink T, Appleton L, Day AS. Vitamin D Therapy in Children with Inflammatory Bowel Disease: A Systematic Review. *World J Clin Pediatr*. (2019) 8(1):1-14. doi: 10.5409/wjcp.v8.i1.1.
14. Whitehouse AJO, Holt BJ, Serralha M, Holt PG, Kusel MMH, Hart PH. Maternal Serum Vitamin D Levels During Pregnancy and Offspring Neurocognitive Development. *Pediatrics*. (2012) 129(3):485-93. doi: 10.1542/peds.2011-2644.
15. Pasco JA, Henry MJ, Nicholson GC, Sanders KM, Kotowicz MA. Vitamin D Status of Women in the Geelong Osteoporosis Study: Association with Diet and Casual Exposure to Sunlight. *Med J Aust*. (2001) 175(8):401-5. doi: 10.5694/j.1326-5377.2001.tb143643.x.
16. Jones G, Dwyer T, Hynes KL, Parameswaran V, Greenaway TM. Vitamin D Insufficiency in Adolescent Males in Southern Tasmania: Prevalence, Determinants, and Relationship to Bone Turnover Markers. *Osteoporos Int*. (2005) 16(6):636-41. doi: 10.1007/s00198-004-1733-z.

17. Pasco JA, Wark JD, Carlin JB, Ponsonby AL, Vuillermin PJ, Morley R. Maternal Vitamin D in Pregnancy May Influence Not Only Offspring Bone Mass but Other Aspects of Musculoskeletal Health and Adiposity. *Med Hypotheses*. (2008) 71(2):266-9. doi: 10.1016/j.mehy.2008.01.033.
18. Tiong AC, Patel MS, Gardiner J, Ryan R, Linton KS, Walker KA, et al. Health Issues in Newly Arrived African Refugees Attending General Practice Clinics in Melbourne. *Med J Aust*. (2006) 185(11-12):602-6. doi: 10.5694/j.1326-5377.2006.tb00724.x.
19. van der Mei IA, Ponsonby AL, Dwyer T, Blizzard L, Taylor BV, Kilpatrick T, et al. Vitamin D Levels in People with Multiple Sclerosis and Community Controls in Tasmania, Australia. *J Neurol*. (2007) 254(5):581-90. doi: 10.1007/s00415-006-0315-8.
20. Lucas RM, Ponsonby AL, Dear K, Valery PC, Pender MP, Taylor BV, et al. Sun Exposure and Vitamin D Are Independent Risk Factors for Cns Demyelination. *Neurology*. (2011) 76(6):540-8. doi: 10.1212/WNL.0b013e31820af93d.
21. Lucas RM, Ponsonby AL, Dear K, Valery PC, Taylor B, van der Mei I, et al. Vitamin D Status: Multifactorial Contribution of Environment, Genes and Other Factors in Healthy Australian Adults across a Latitude Gradient. *J Steroid Biochem Mol Biol*. (2013) 136:300-8. doi: 10.1016/j.jsbmb.2013.01.011.
22. Lucas R, Ponsonby AL, McMichael A, van der Mei I, Chapman C, Coulthard A, et al. Observational Analytic Studies in Multiple Sclerosis: Controlling Bias through Study Design and Conduct. The Australian Multicentre Study of Environment and Immune Function. *Mult Scler*. (2007) 13(7):827-39. doi: 10.1177/1352458507077174.
23. Staples JA, Ponsonby A-L, Lim LL-Y, McMichael AJ. Ecologic Analysis of Some Immune-Related Disorders, Including Type 1 Diabetes, in Australia: Latitude, Regional Ultraviolet Radiation, and Disease Prevalence. *Environ Health Perspect*. (2003) 111(4):518-23. doi: 10.1289/ehp.5941.

24. Jablonski NG, Chaplin G. The Evolution of Human Skin Coloration. *J Hum Evol.* (2000) 39(1):57-106. doi: 10.1006/jhev.2000.0403.
25. van der Mei IA, Blizzard L, Ponsonby AL, Dwyer T. Validity and Reliability of Adult Recall of Past Sun Exposure in a Case-Control Study of Multiple Sclerosis. *Cancer Epidemiol Biomarkers Prev.* (2006) 15(8):1538-44. doi: 10.1158/1055-9965.Epi-05-0969.
26. Elliott JC, Lucas RM, Clements MS, Bambrick HJ. Population Density Determines the Direction of the Association between Ambient Ultraviolet Radiation and Type 1 Diabetes Incidence. *Pediatr Diabetes.* (2010) 11(6):394-402. doi: 10.1111/j.1399-5448.2009.00620.x.
27. Flicker L, Mead K, MacInnis RJ, Nowson C, Scherer S, Stein MS, et al. Serum Vitamin D and Falls in Older Women in Residential Care in Australia. *J Am Geriatr Soc.* (2003) 51(11):1533-8. doi: 10.1046/j.1532-5415.2003.51510.x.
28. Stein MS, Scherer SC, Walton SL, Gilbert RE, Ebeling PR, Flicker L, et al. Risk Factors for Secondary Hyperparathyroidism in a Nursing Home Population. *Clin Endocrinol (Oxf).* (1996) 44(4):375-83. doi: 10.1046/j.1365-2265.1996.701521.x.
29. Sambrook PN, Cameron ID, Chen JS, Cumming RG, Durvasula S, Herrmann M, et al. Does Increased Sunlight Exposure Work as a Strategy to Improve Vitamin D Status in the Elderly: A Cluster Randomised Controlled Trial. *Osteoporos Int.* (2012) 23(2):615-24. doi: 10.1007/s00198-011-1590-5.
30. Nowson CA, Sherwin AJ, McPhee JG, Wark JD, Flicker L. Energy, Protein, Calcium, Vitamin D and Fibre Intakes from Meals in Residential Care Establishments in Australia. *Asia Pac J Clin Nutr.* (2003) 12(2):172-7.
31. Quaggiotto P, Tran H, Bhanugopan M. Vitamin D Deficiency Remains Prevalent Despite Increased Laboratory Testing in New South Wales, Australia. *Singapore Med J.* (2014) 55(5):271-80. doi: 10.11622/smedj.2014071.

32. Flicker L, MacInnis RJ, Stein MS, Scherer SC, Mead KE, Nowson CA, et al. Should Older People in Residential Care Receive Vitamin D to Prevent Falls? Results of a Randomized Trial. *J Am Geriatr Soc.* (2005) 53(11):1881-8. doi: 10.1111/j.1532-5415.2005.00468.x.
33. Sambrook PN, Chen JS, March LM, Cameron ID, Cumming RG, Lord SR, et al. Serum Parathyroid Hormone Predicts Time to Fall Independent of Vitamin D Status in a Frail Elderly Population. *J Clin Endocrinol Metab.* (2004) 89(4):1572-6. doi: 10.1210/jc.2003-031782.
34. Hirani V, Naganathan V, Cumming RG, Blyth F, Le Couteur DG, Handelsman DJ, et al. Associations between Frailty and Serum 25-Hydroxyvitamin D and 1,25-Dihydroxyvitamin D Concentrations in Older Australian Men: The Concord Health and Ageing in Men Project. *J Gerontol A Biol Sci Med Sci.* (2013) 68(9):1112-21. doi: 10.1093/gerona/glt059.
35. Latham NK, Anderson CS, Lee A, Bennett DA, Moseley A, Cameron ID. A Randomized, Controlled Trial of Quadriceps Resistance Exercise and Vitamin D in Frail Older People: The Frailty Interventions Trial in Elderly Subjects (Fitness). *J Am Geriatr Soc.* (2003) 51(3):291-9. doi: 10.1046/j.1532-5415.2003.51101.x.
36. Morris HA, Morrison GW, Burr M, Thomas DW, Nordin BE. Vitamin D and Femoral Neck Fractures in Elderly South Australian Women. *Med J Aust.* (1984) 140(9):519-21. doi: 10.5694/j.1326-5377.1984.tb108222.x.
37. Daly RM, Gagnon C, Lu ZX, Magliano DJ, Dunstan DW, Sikaris KA, et al. Prevalence of Vitamin D Deficiency and Its Determinants in Australian Adults Aged 25 Years and Older: A National, Population-Based Study. *Clin Endocrinol (Oxf).* (2012) 77(1):26-35. doi: 10.1111/j.1365-2265.2011.04320.x.

38. Gagnon C, Lu ZX, Magliano DJ, Dunstan DW, Shaw JE, Zimmet PZ, et al. Low Serum 25-Hydroxyvitamin D Is Associated with Increased Risk of the Development of the Metabolic Syndrome at Five Years: Results from a National, Population-Based Prospective Study (the Australian Diabetes, Obesity and Lifestyle Study: Ausdiab). *J Clin Endocrinol Metab.* (2012) 97(6):1953-61. doi: 10.1210/jc.2011-3187.
39. Black LJ, Burrows SA, Jacoby P, Oddy WH, Beilin LJ, Chan She Ping-Delfos W, et al. Vitamin D Status and Predictors of Serum 25-Hydroxyvitamin D Concentrations in Western Australian Adolescents. *Br J Nutr.* (2014) 112(7):1154-62. doi: 10.1017/s000711451400186x.
40. Malacova E, Cheang PR, Dunlop E, Sherriff JL, Lucas RM, Daly RM, et al. Prevalence and Predictors of Vitamin D Deficiency in a Nationally Representative Sample of Adults Participating in the 2011-2013 Australian Health Survey. *Br J Nutr.* (2019) 121(8):894-904. doi: 10.1017/s0007114519000151.
41. Vanlint SJ, Morris HA, Newbury JW, Crockett AJ. Vitamin D Insufficiency in Aboriginal Australians. *Med J Aust.* (2011) 194(3):131-4. doi: 10.5694/j.1326-5377.2011.tb04195.x.
42. Dunlop E, Cunningham J, Sherriff JL, Lucas RM, Greenfield H, Arcot J, et al. Vitamin D<sub>3</sub> and 25-Hydroxyvitamin D<sub>3</sub> Content of Retail White Fish and Eggs in Australia. *Nutrients.* (2017) 9(7):647. doi: 10.3390/nu9070647.
43. Black LJ, Jacoby P, Nowson CA, Daly RM, Lucas RM. Predictors of Vitamin D-Containing Supplement Use in the Australian Population and Associations between Dose and Serum 25-Hydroxyvitamin D Concentrations. *Nutrients.* (2016) 8(6):356. doi: 10.3390/nu8060356.



44. Hughes AM, Armstrong BK, Vajdic CM, Turner J, Grulich AE, Fritschi L, et al. Sun Exposure May Protect against Non-Hodgkin Lymphoma: A Case-Control Study. *Int J Cancer*. (2004) 112(5):865-71. doi: 10.1002/ijc.20470.
45. van der Mei IA, Ponsonby AL, Engelsen O, Pasco JA, McGrath JJ, Eyles DW, et al. The High Prevalence of Vitamin D Insufficiency across Australian Populations Is Only Partly Explained by Season and Latitude. *Environ Health Perspect*. (2007) 115(8):1132-9. doi: 10.1289/ehp.9937.
46. Bogh MKB, Schmedes AV, Philipsen PA, Thieden E, Wulf HC. Vitamin D Production after Uvb Exposure Depends on Baseline Vitamin D and Total Cholesterol but Not on Skin Pigmentation. *J Invest Dermatol*. (2010) 130(2):546-53. doi: 10.1038/jid.2009.323.
47. Youl PH, Janda M, Kimlin M. Vitamin D and Sun Protection: The Impact of Mixed Public Health Messages in Australia. *Int J Cancer*. (2009) 124(8):1963-70. doi: 10.1002/ijc.24154.
48. Marks R, Foley PA, Jolley D, Knight KR, Harrison J, Thompson SC. The Effect of Regular Sunscreen Use on Vitamin D Levels in an Australian Population. Results of a Randomized Controlled Trial. *Arch Dermatol*. (1995) 131(4):415-21. doi: 10.1001/archderm.1995.01690160043006.
49. Kimlin M, Harrison S, Nowak M, Moore M, Brodie A, Lang C. Does a High Uv Environment Ensure Adequate Vitamin D Status? *J Photochem Photobiol B*. (2007) 89(2-3):139-47. doi: 10.1016/j.jphotobiol.2007.09.008.
50. Jayaratne N, Russell A, van der Pols JC. Sun Protection and Vitamin D Status in an Australian Subtropical Community. *Prev Med*. (2012) 55(2):146-50. doi: 10.1016/j.ypmed.2012.05.011.

51. Godar DE. Uv Doses Worldwide. *Photochem Photobiol.* (2005) 81(4):736-49. doi: 10.1562/2004-09-07-ir-308r.1.
52. Pasco JA, Henry MJ, Kotowicz MA, Sanders KM, Seeman E, Pasco JR, et al. Seasonal Periodicity of Serum Vitamin D and Parathyroid Hormone, Bone Resorption, and Fractures: The Geelong Osteoporosis Study. *J Bone Miner Res.* (2004) 19(5):752-8. doi: 10.1359/jbmr.040125.
53. Pasco JA, Henry MJ, Nicholson GC, Brennan SL, Kotowicz MA. Behavioural and Physical Characteristics Associated with Vitamin D Status in Women. *Bone.* (2009) 44(6):1085-91. doi: 10.1016/j.bone.2009.02.020.
54. Callegari ET, Reavley N, Garland SM, Gorelik A, Wark JD. Vitamin D Status, Bone Mineral Density and Mental Health in Young Australian Women: The Safe-D Study. *J Public Health Res.* (2015) 4(3):594. doi: 10.4081/jphr.2015.594.
55. Sambrook PN, Seeman E, Phillips SR, Ebeling PR. Preventing Osteoporosis: Outcomes of the Australian Fracture Prevention Summit. *Med J Aust.* (2002) 176(S8):S1-16. doi: 10.5694/j.1326-5377.2002.tb04475.x.
56. Ebeling PR, Daly RM, Kerr DA, Kimlin MG. Building Healthy Bones Throughout Life: An Evidence-Informed Strategy to Prevent Osteoporosis in Australia. *Med J Aust.* (2013) 199(S7):S1-S46. doi: 10.5694/j.1326-5377.2013.tb04225.x.
57. Nguyen TV, Center JR, Eisman JA. Osteoporosis: Underrated, Underdiagnosed and Undertreated. *Med J Aust.* (2004) 180(S5):S18-22. doi: 10.5694/j.1326-5377.2004.tb05908.x.
58. Bleicher K, Naganathan V, Cumming RG, Seibel MJ, Sambrook PN, Blyth FM, et al. Prevalence and Treatment of Osteoporosis in Older Australian Men: Findings from the Champ Study. *Med J Aust.* (2010) 193(7):387-91. doi: 10.5694/j.1326-5377.2010.tb03964.x.

59. Bilinski K, Boyages S. Evidence of Overtesting for Vitamin D in Australia: An Analysis of 4.5 Years of Medicare Benefits Schedule (Mbs) Data. *BMJ Open*. (2013) 3(6):e002955. doi: 10.1136/bmjopen-2013-002955.
60. Gagnon C, Lu ZX, Magliano DJ, Dunstan DW, Shaw JE, Zimmet PZ, et al. Serum 25-Hydroxyvitamin D, Calcium Intake, and Risk of Type 2 Diabetes after 5 Years: Results from a National, Population-Based Prospective Study (the Australian Diabetes, Obesity and Lifestyle Study). *Diabetes Care*. (2011) 34(5):1133-8. doi: 10.2337/dc10-2167.
61. Ding C, Cicuttini F, Parameswaran V, Burgess J, Quinn S, Jones G. Serum Levels of Vitamin D, Sunlight Exposure, and Knee Cartilage Loss in Older Adults: The Tasmanian Older Adult Cohort Study. *Arthritis Rheum*. (2009) 60(5):1381-9. doi: 10.1002/art.24486.
62. Lovell G. Vitamin D Status of Females in an Elite Gymnastics Program. *Clin J Sport Med*. (2008) 18(2):159-61. doi: 10.1097/JSM.0b013e3181650eee.
